# Supplementary material for: Palmitate and insulin counteract glucose-induced thioredoxin interacting protein (TXNIP) expression in insulin secreting cells via distinct mechanisms
Source: PubMed Central journal article supplement (PMC5973613; doi:10.1371/journal.pone.0198016), 2018-05-29
Supplement: pone.0198016.s001.pdf [file pone.0198016.s001.pdf]

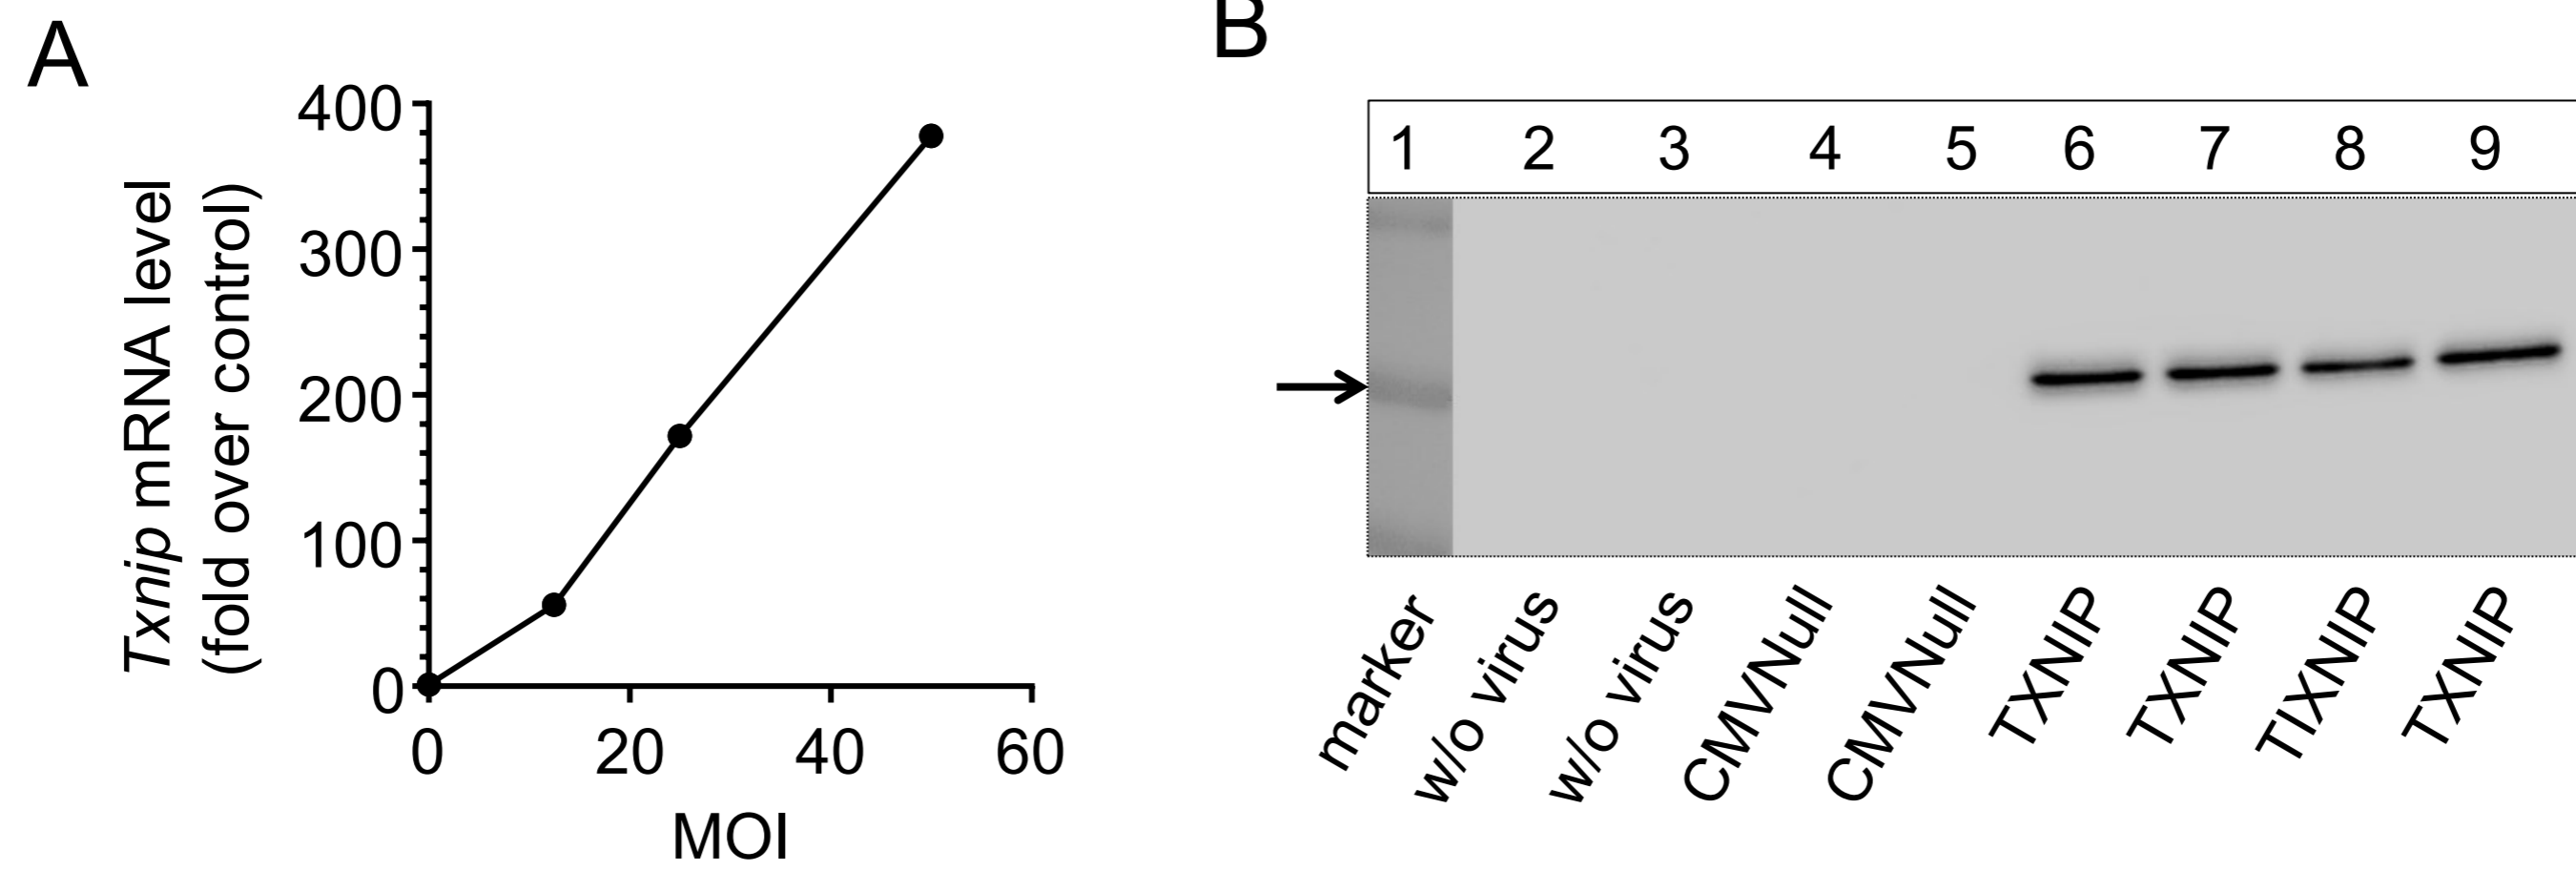

**S1 Fig. Overexpression of *TXNIP* in INS-1 E cells.** INS-1E cells were cultured and transfected as described under Material and methods. (A) Relative *TXNIP* mRNA (fold change over control, untransfected cells) and (B) western blot for *TXNIP* showing *TXNIP* overexpression in transfected cells. Marker at 50 kDa.
