# Supplementary material for: Palmitate and insulin counteract glucose-induced thioredoxin interacting protein (TXNIP) expression in insulin secreting cells via distinct mechanisms
Source: PubMed Central journal article supplement (PMC5973613; doi:10.1371/journal.pone.0198016), 2018-05-29
Supplement: pone.0198016.s003.pdf [file pone.0198016.s003.pdf]

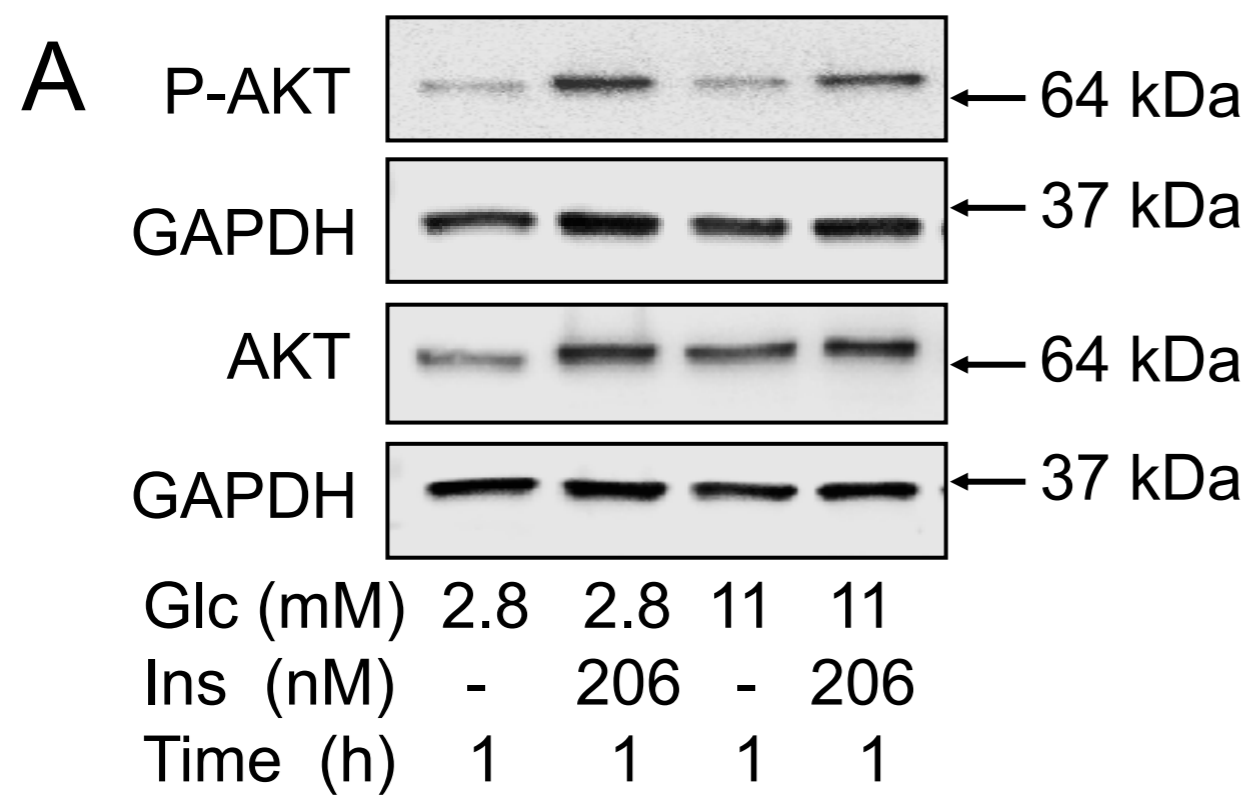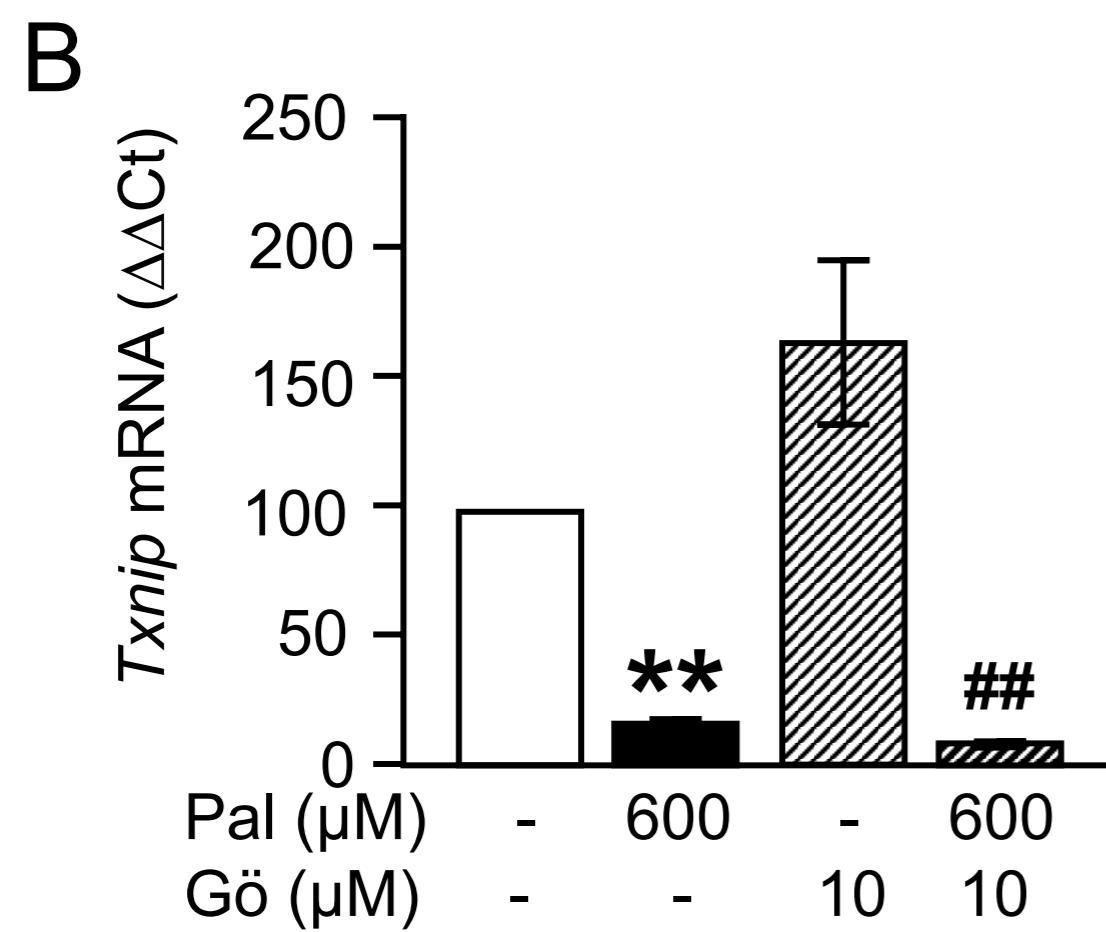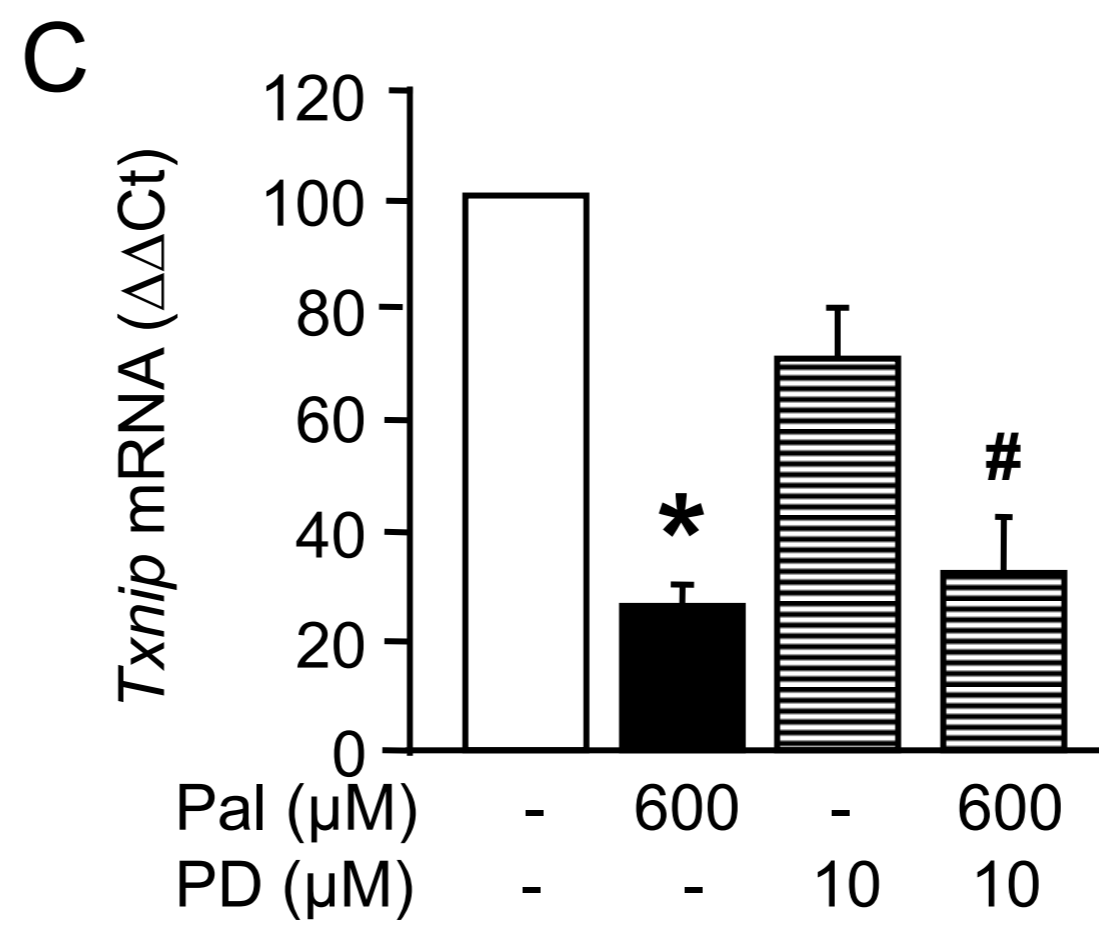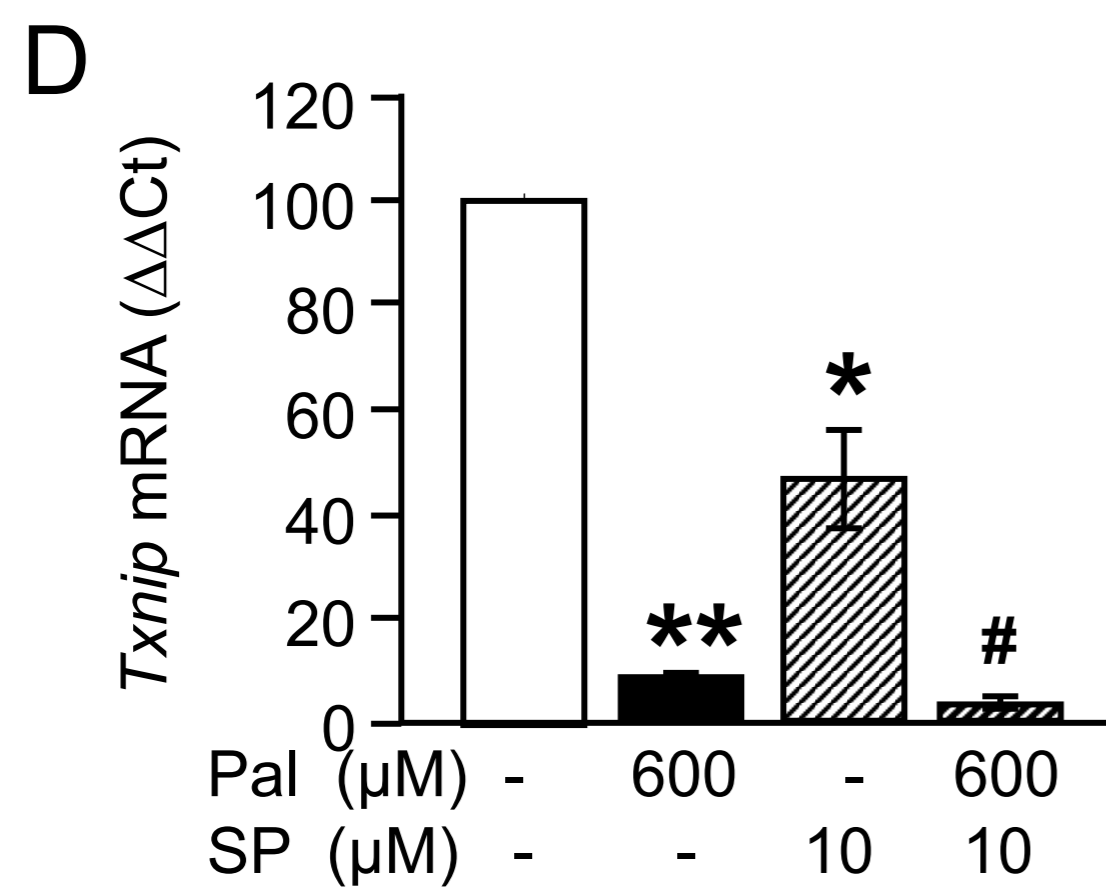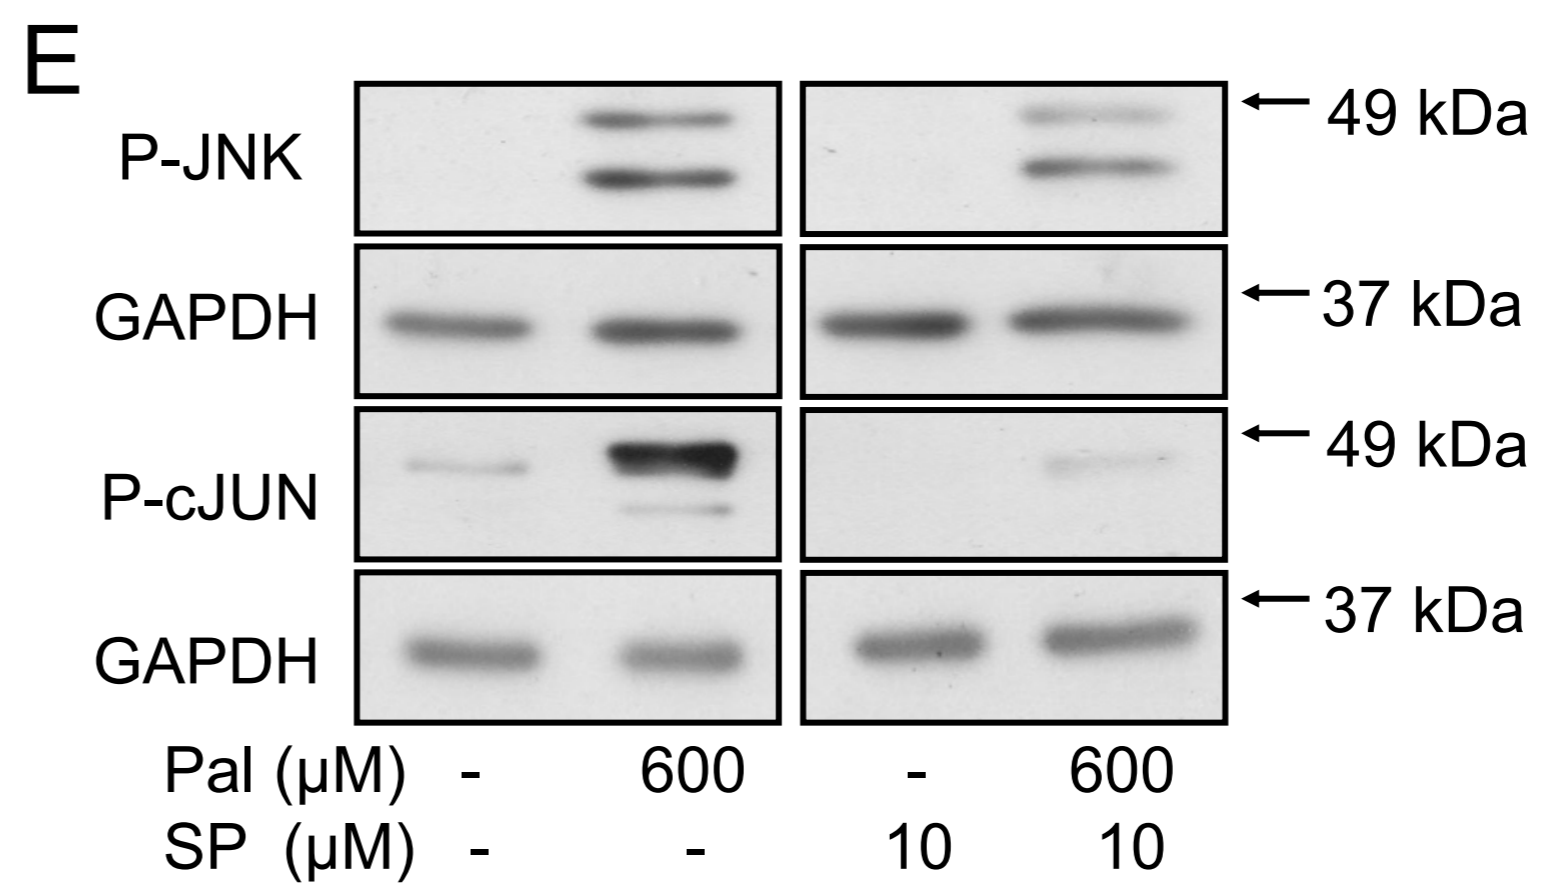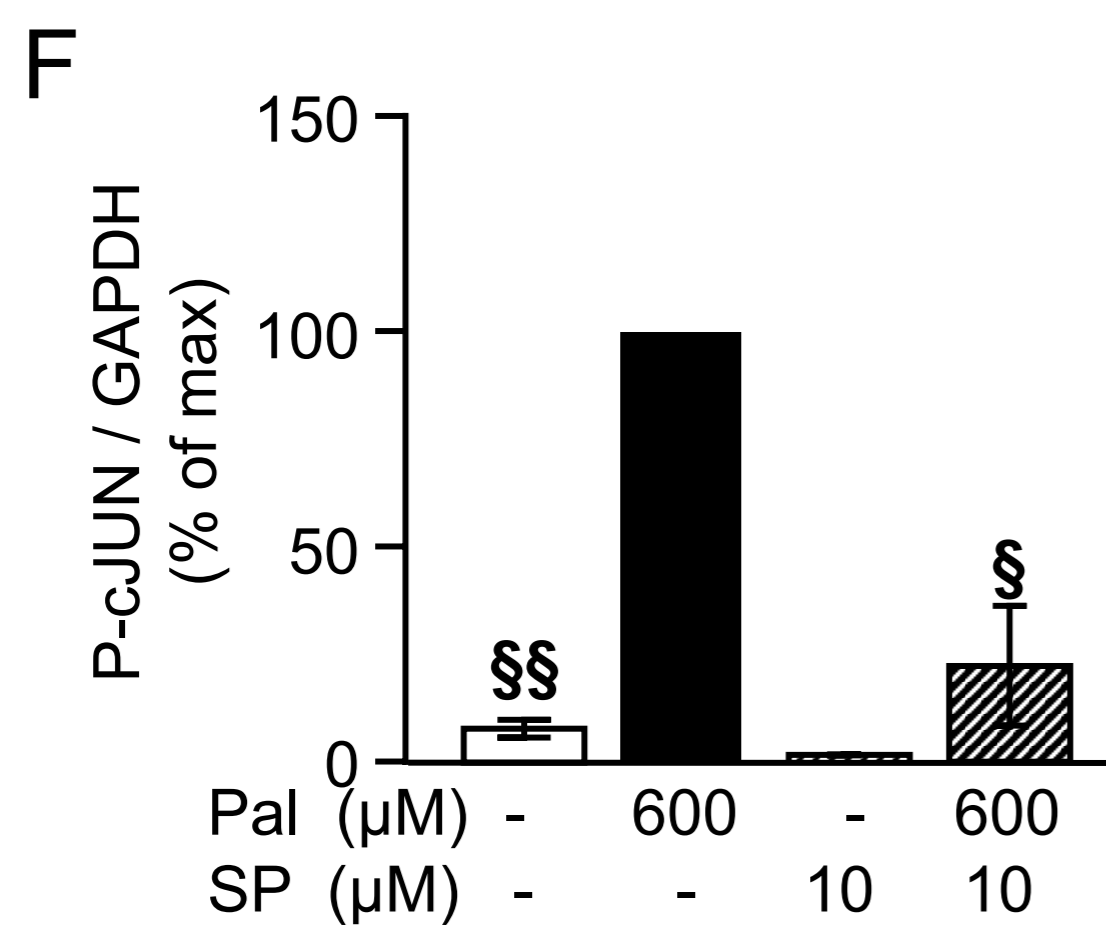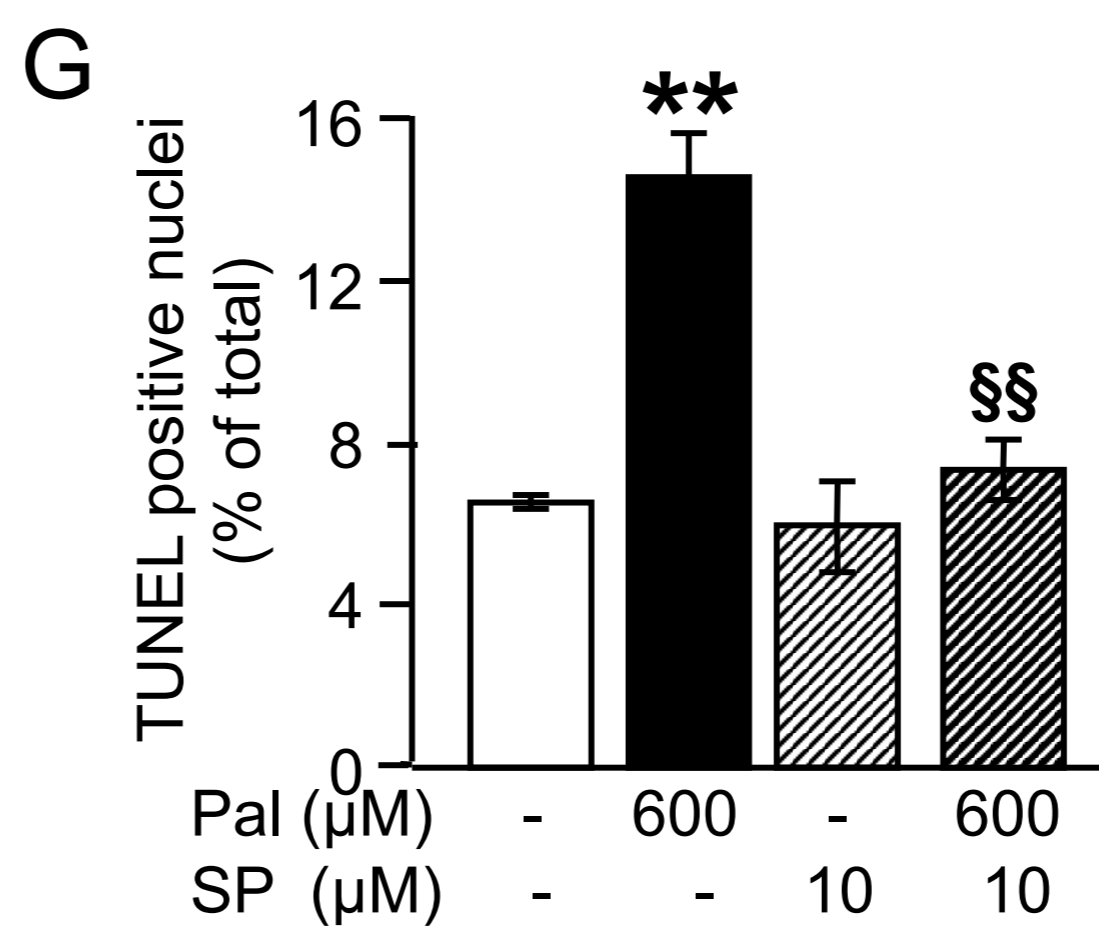

**S3 Fig. Palmitate-induced reduction of TXNIP mRNA levels is independent of PKC $\alpha/\beta$ , ERK and JNK signalling.** INS-1E cells were cultured in the presence of (A) 2.8 mM or (B-G) 11 mM glucose and test substances for (A) 1 h or (B-G) 24 h. (A) Representative western blot of <sup>473</sup>Ser-P-AKT and AKT. (B-D) Changes of TXNIP mRNA levels ( $\Delta\Delta\text{Ct}$ ) vs control (first column in each graph) set to 100%. (E, F) Representative western blots and quantitative analysis of n=3 independent experiments of <sup>183</sup>Thr/<sup>185</sup>Tyr-P-JNK and <sup>73</sup>Ser-P-cJUN. GAPDH was used as the loading control. (G) Cell death was evaluated by the percentage of TUNEL-positive cells. Results are expressed as mean  $\pm$  SEM of n=3-4 independent experiments. \*p<0.05, \*\*p<0.01 denotes significance to control (first bar of each graph); #p<0.05, ##p<0.01 indicates a significant Pal effect in the presence of inhibitor (Gö, PD or SP); §p<0.05, §§p<0.01 indicates significance to Pal. Abbreviations: Pal, palmitate; Gö, Gö6976 (PKC $\alpha/\beta$  inhibitor); PD, PD98059 (ERK1/2 inhibitor); SP, SP600125 (JNK inhibitor).
