# Supplementary material for: Palmitate and insulin counteract glucose-induced thioredoxin interacting protein (TXNIP) expression in insulin secreting cells via distinct mechanisms
Source: PubMed Central journal article supplement (PMC5973613; doi:10.1371/journal.pone.0198016), 2018-05-29
Supplement: pone.0198016.s004.pdf [file pone.0198016.s004.pdf]

S1 Table: Primers and probes used for qRT-PCR

| <b>Species</b> | <b>Gene</b>  | <b>Roche probe</b> | <b>Upstream primer</b>        | <b>Downstream primer</b>     |
|----------------|--------------|--------------------|-------------------------------|------------------------------|
| <b>Human</b>   | <i>RPS13</i> | #68                | 5'-CCCCACTTGTTGAAGTTGA-3'     | 5'-ACACCATGTGAATCTCTCAGGA-3' |
|                | <i>TXNIP</i> | #3                 | 5'-GGCTAAAGTGCTTTGGATGC-3'    | 5'-TGATCACCATCTCATTCTCACC-3' |
| <b>Mouse</b>   | <i>Rps13</i> | #110               | 5'-TGCTCCCACCTAATTGGAAA-3'    | 5'-CTTGTGCACACAACAGCATT-3'   |
|                | <i>Txnip</i> | #62                | 5'-CAAAGTCGAATACTCCTTGCTGA-3' | 5'-CTGAATGTCCGGCTGCTC-3'     |
| <b>Rat</b>     | <i>Rps13</i> | #12                | 5'-CTGACGACGTGAAGGAACAA-3'    | 5'-TCACAAAACGGACCTGTGC-3'    |
|                | <i>Txnip</i> | #20                | 5'-GGGTGAAGGCTTTTCTCGAT-3'    | 5'-CCTTTTTGGCAGACACTGGT-3'   |
